# Supplementary material for: 3D and in situ electron microscopy studies of the nucleation and growth processes of cobalt-based nanoparticles synthesized via thermal decomposition on carbon nanotubes
Source: Royal Society of Chemistry journal article supplement (doi:10.1039/d5nr01112d), 2025-01-01
Supplement: d5nr01112d1.pdf [file d5nr01112d1.pdf]

## **Supporting information**

### **3D and *in situ* electron microscopy study of the nucleation and growth processes of cobalt-based nanoparticles synthesized by thermal decomposition on carbon nanotubes**

Alae Ait Kerroum,<sup>a</sup> Dris Ihiawakrim,<sup>a</sup> Ovidiu Ersen<sup>a</sup> and Walid Baaziz,<sup>a,\*</sup>

<sup>a</sup> *Institut de Physique et Chimie des Matériaux de Strasbourg (IPCMS), UMR 7504 du CNRS, Université de Strasbourg, 23 rue du Loess, 67037 Strasbourg Cedex 08, France*

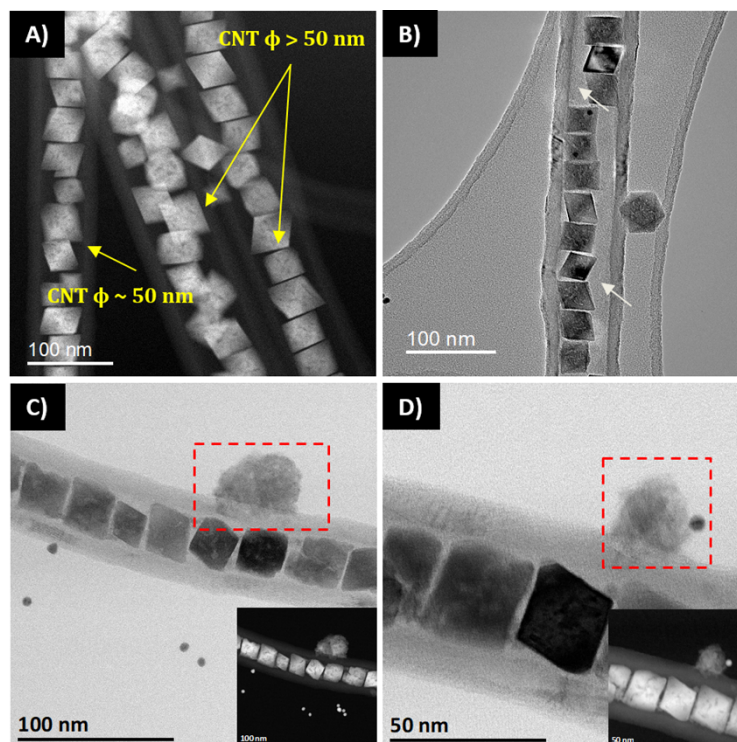

**Figure S1.** ADF STEM (A), TEM (B) and BF STEM (C-D) images of the Co-based NPs synthesized inside the CNT channels; few ones are anchored at the external surface.

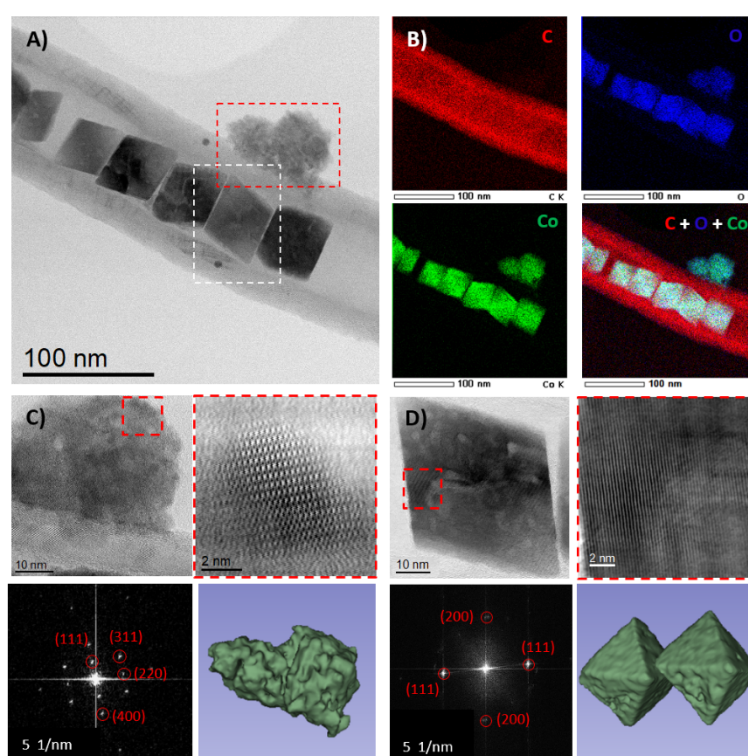

**Figure S2.** A) BF STEM image of the Co-based@CNT particle present in Figure 1. B) EDS maps of C, O and Co of the Co-based@CNT present in A). HR-STEM images, FFT micrographs and 3D models of typical Co-based NPs localized outside C) and inside D) the CNT channel as shown in A).

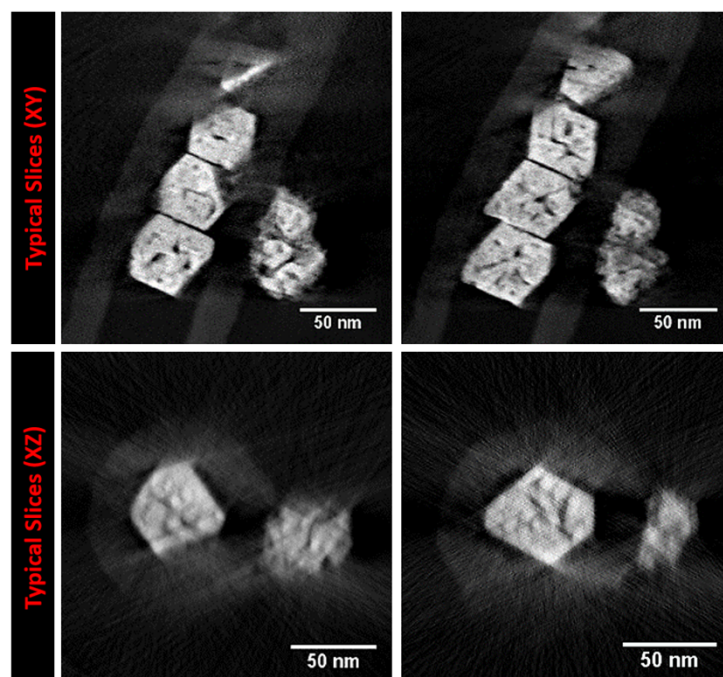

**Figure S3.** Typical (XY) and (XZ) slices extracted from the 3d volume calculated by tomography of Co-based/CNT grain present in Figure 1.

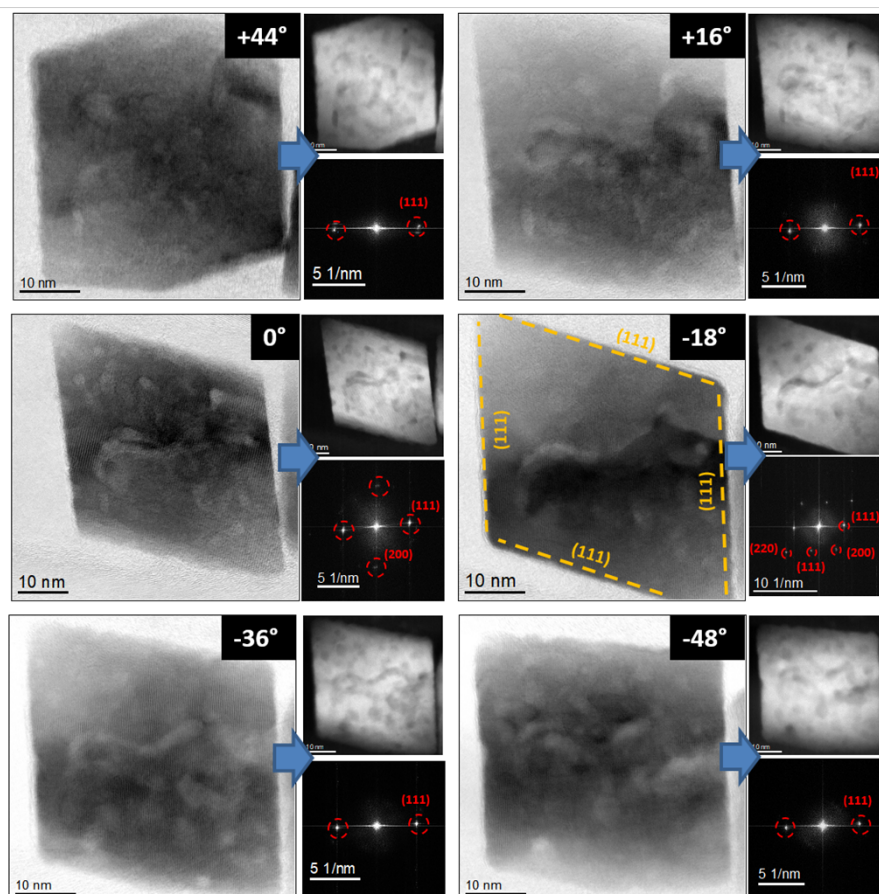

**Figure S4.** Identification of crystallographic facets of a typical CoO@CNT particle using STEM-HR images correlated with corresponding FFT micrographs between +44° and -48° from the initial position on the TEM grid.

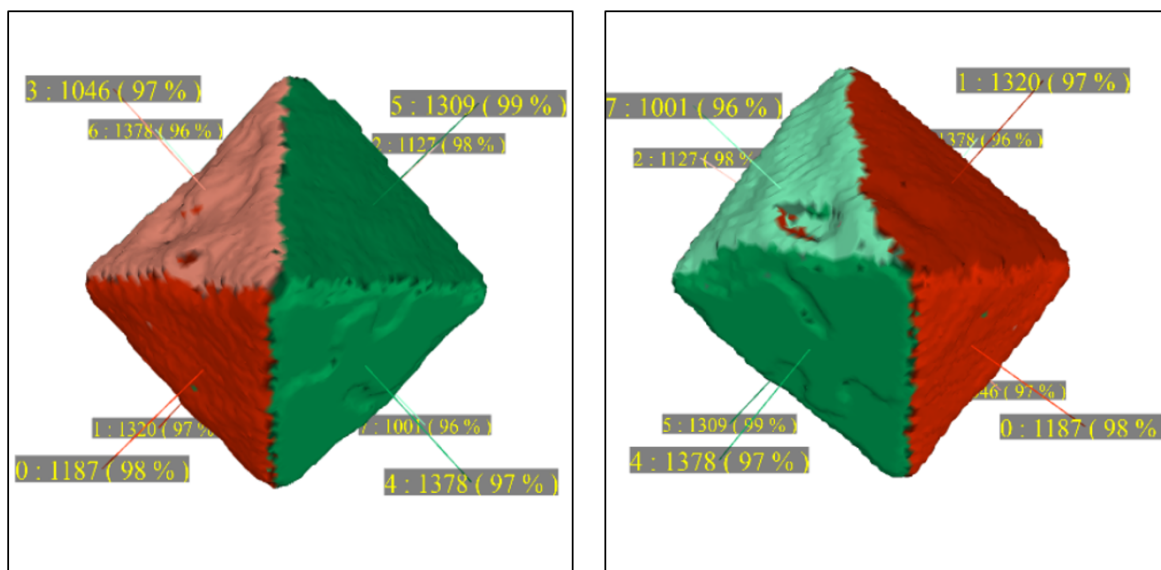

**Figure S5.** 3d model of typical Co-based NPs filled in the CNT with quantified facets using tomographic approach.

**Table S1.** 3D surface quantification of typical CoO particle synthesized inside the CNTs channels.

| Facets | Total surface of the facet (pixel) <sup>2</sup> | Well-defined surface (without deviated surface at the edges) (pixel) <sup>2</sup> | Deviated surface (pixel) <sup>2</sup> |
|--------|-------------------------------------------------|-----------------------------------------------------------------------------------|---------------------------------------|
| 1      | 1043                                            | 1001                                                                              | 42                                    |
| 2      | 1078                                            | 1046                                                                              | 32                                    |
| 3      | 1150                                            | 1127                                                                              | 23                                    |
| 4      | 1211                                            | 1187                                                                              | 24                                    |
| 5      | 1322                                            | 1309                                                                              | 13                                    |
| 6      | 1361                                            | 1320                                                                              | 41                                    |
| 7      | 1420                                            | 1378                                                                              | 42                                    |
| 8      | 1435                                            | 1378                                                                              | 57                                    |
|        |                                                 |                                                                                   |                                       |
| Σ      | 10020                                           | 9746                                                                              | 274                                   |
